# Supplementary material for: Synaptic basis for intense thalamocortical activation of feedforward inhibitory cells in neocortex
Source: Springer Nature journal article supplement (doi:10.1038/nn1861), 2007-03-04
Supplement: 41593_2007_BFnn1861_MOESM11_ESM.pdf [file 41593_2007_BFnn1861_MOESM11_ESM.pdf]

**a** Intrinsic properties & synaptic reversal potentials:

| FS                       | RS                        | Common              |
|--------------------------|---------------------------|---------------------|
| $R_{in}$ : 81 M $\Omega$ | $R_{in}$ : 400 M $\Omega$ | $E_{rest}$ : -79 mV |
| $\tau_m$ : 9 ms          | $\tau_m$ : 28 ms          | $E_e$ : 0 mV        |
| $C_{in}$ : 110 pF        | $C_{in}$ : 70 pF          | $E_i$ : -91 mV      |

**b** Synaptic conductances

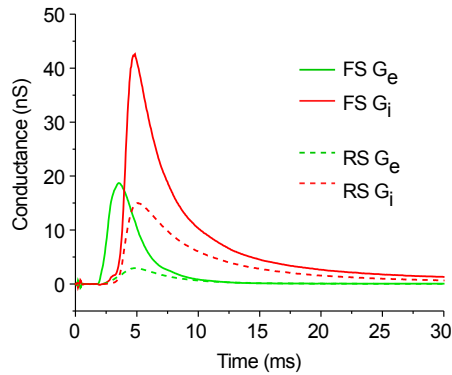

**c** Conductance wave shapes

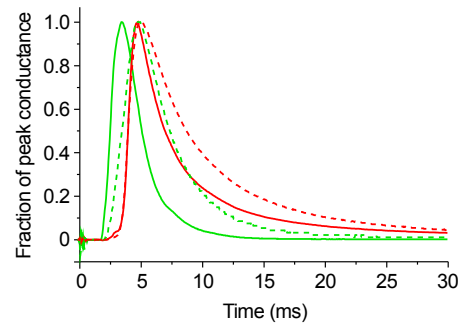

**Supplementary Figure 2:** Mean intrinsic properties, reversal potentials and synaptic conductances recorded during the experiments and applied in the models. **(a)** The intrinsic properties and synaptic reversal potentials applied in the models for the two cell types. The input resistances ( $R_{in}$ ), membrane time constants ( $\tau_m$ ), input capacitances ( $C_{in}$ ), inhibitory synaptic reversal potential ( $E_i$ ), and resting potential ( $E_{rest}$ ), were derived from the neurophysiology experiments. The excitatory reversal potential ( $E_e$ ) was assumed. **(b)** Excitatory and inhibitory synaptic conductances for the FS cells and RS cells used to obtain the modeling results. These were the mean waveforms across cells ( $n = 15$  each) from the experiments of Figure 2. **(c)** The same synaptic conductances as in panel b, but normalized to their peaks to facilitate comparison of wave shapes/time-courses.
