# Supplementary material for: Synaptic basis for intense thalamocortical activation of feedforward inhibitory cells in neocortex
Source: Springer Nature journal article supplement (doi:10.1038/nn1861), 2007-03-04
Supplement: 41593_2007_BFnn1861_MOESM12_ESM.pdf [file 41593_2007_BFnn1861_MOESM12_ESM.pdf]

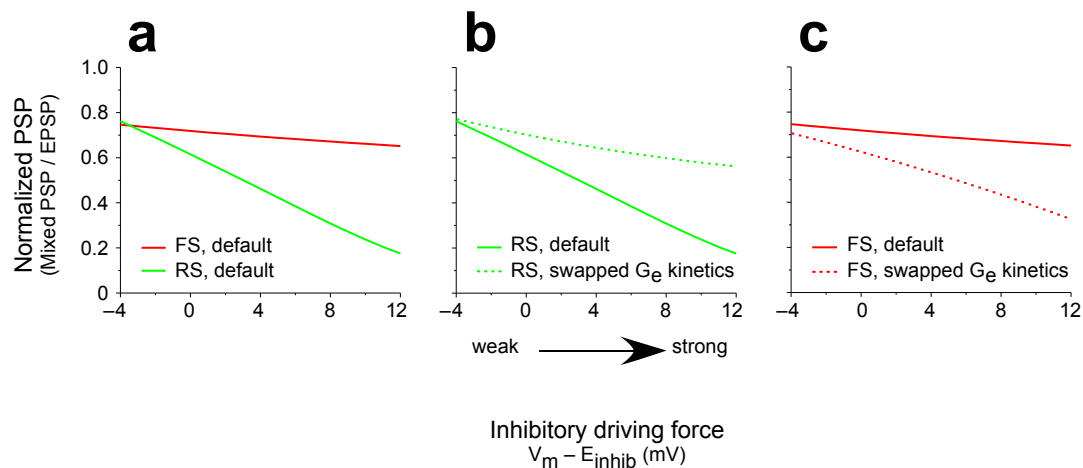

**Supplementary Figure 3:** The influence of  $G_e$  kinetics on functional inhibition depends on inhibitory driving force. **(a)** Effect of inhibitory driving force on normalized PSP size (i.e. Mixed PSP / EPSP) for the FS and RS model cells. Normalized PSP is an index of inhibitory function; a value of 1.0 would indicate no effect of inhibition (i.e. the mixed PSP = the pure EPSP), and values close to 0 would indicate nearly complete suppression of the PSP by inhibition. Inhibitory driving force equals the voltage difference between the membrane potential ( $V_m$ ) and inhibitory reversal potential ( $E_{inhib}$ ). We varied inhibitory driving force by changing the  $V_m$ , setting  $E_{inhib}$  to  $-91$  mV. High values of inhibitory driving force would occur if  $V_m$  was depolarized compared with  $E_{inhib}$ , while low or negative values would occur if  $V_m$  was equal to, or more hyperpolarized than,  $E_{inhib}$ . Notice the sensitivity of the RS cell to inhibitory driving force. When the  $V_m$  was depolarized 12 mV above  $E_{inhib}$ , the PSP in the RS cell was suppressed approximately 80% (relative to the EPSP), but when the  $V_m$  was hyperpolarized 4 mV below  $E_{inhib}$ , suppression was only about 25% (green curve). In contrast the FS suppression was only slightly affected by inhibitory driving force (red curve). **(b)** The RS sensitivity to inhibitory driving force was strongly attenuated by speeding up the  $G_e$  kinetics to match the FS kinetics (RS, swapped  $G_e$  kinetics; see Supplementary Methods and Fig. 4E). Notice the similarity between the RS swapped function (dashed green curve) and the FS default function (panel A, solid red curve). **(c)** Sensitivity to inhibitory driving force could be induced in the FS cell by slowing the  $G_e$  kinetics to match the RS default kinetics (FS, swapped  $G_e$  kinetics, dashed red curve). Together, these data indicate that RS cells are more sensitive than FS cells to inhibitory driving force, and this is caused primarily by differences in  $G_e$  kinetics.

**Supplementary Figure 3:** The influence of  $G_e$  kinetics on functional inhibition depends on inhibitory driving force. **(a)** Effect of inhibitory driving force on normalized PSP size (i.e. Mixed PSP / EPSP) for the FS and RS model cells. Normalized PSP is an index of inhibitory function; a value of 1.0 would indicate no effect of inhibition (i.e. the mixed PSP = the pure EPSP), and values close to 0 would indicate nearly complete suppression of the PSP by inhibition. Inhibitory driving force equals the voltage difference between the membrane potential ( $V_m$ ) and inhibitory reversal potential ( $E_{\text{inhib}}$ ). We varied inhibitory driving force by changing the  $V_m$ , setting  $E_{\text{inhib}}$  to  $-91$  mV. High values of inhibitory driving force would
