# Supplementary material for: Synaptic basis for intense thalamocortical activation of feedforward inhibitory cells in neocortex
Source: Springer Nature journal article supplement (doi:10.1038/nn1861), 2007-03-04
Supplement: 41593_2007_BFnn1861_MOESM13_ESM.pdf [file 41593_2007_BFnn1861_MOESM13_ESM.pdf]

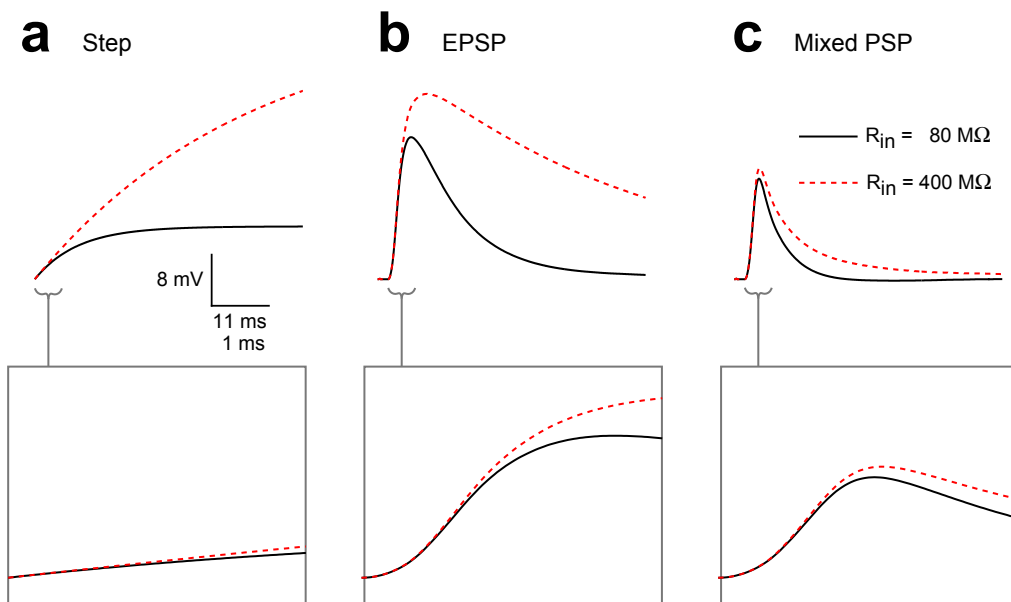

**Supplementary Figure 4:** Effects of input resistance ( $R_{in}$ ) on time-course of PSPs. **(a)** Responses of FS model cell to 100 pA current step. The solid black trace is the voltage response when the resting  $R_{in}$  was set to the default FS value of 80 M $\Omega$  and the dashed red trace is the response when  $R_{in}$  was set to 400 M $\Omega$  (the RS default value). In the FS cell, the membrane time constant with the default  $R_{in}$  was 8 ms, whereas it was 40 ms when given the larger RS  $R_{in}$ . Thus, the voltage response of the cell was larger and required a longer time to approach steady-state when it had a larger  $R_{in}$ . However, the actual change in voltage per unit time ( $dV/dt$ ) was higher with the larger  $R_{in}$ . **(b)** EPSP responses to default  $G_e$  injections in the FS cell. When the FS cell was given a higher  $R_{in}$  (red), the total EPSP rise time (from onset to peak) became longer. However, the rate of rise ( $dV/dt$ ) became slightly steeper despite the slower  $\tau_m$  (see inset at faster sweep speed; bottom). In this case, therefore, the cell would reach spike threshold faster if it had the slower  $\tau_m$ . **(c)** Mixed PSPs in the FS cell when default  $G_e$  and  $G_i$  were injected together. The effects of switching  $R_{in}$  were conceptually similar to those in panel “b”. Obviously, the decay times would become longer in cells with higher  $R_{in}$  / slower  $\tau_m$ .
